# Supplementary material for: Three-Dimensional Co-Culture System of Human Osteoblasts and Osteoclast Precursors from Osteoporotic Patients as an Innovative Model to Study the Role of Nutrients: Focus on Vitamin K2
Source: MDPI journal article supplement (doi:10.3390/nu13082823), 2021-08-17
Supplement: s1 [file s1]

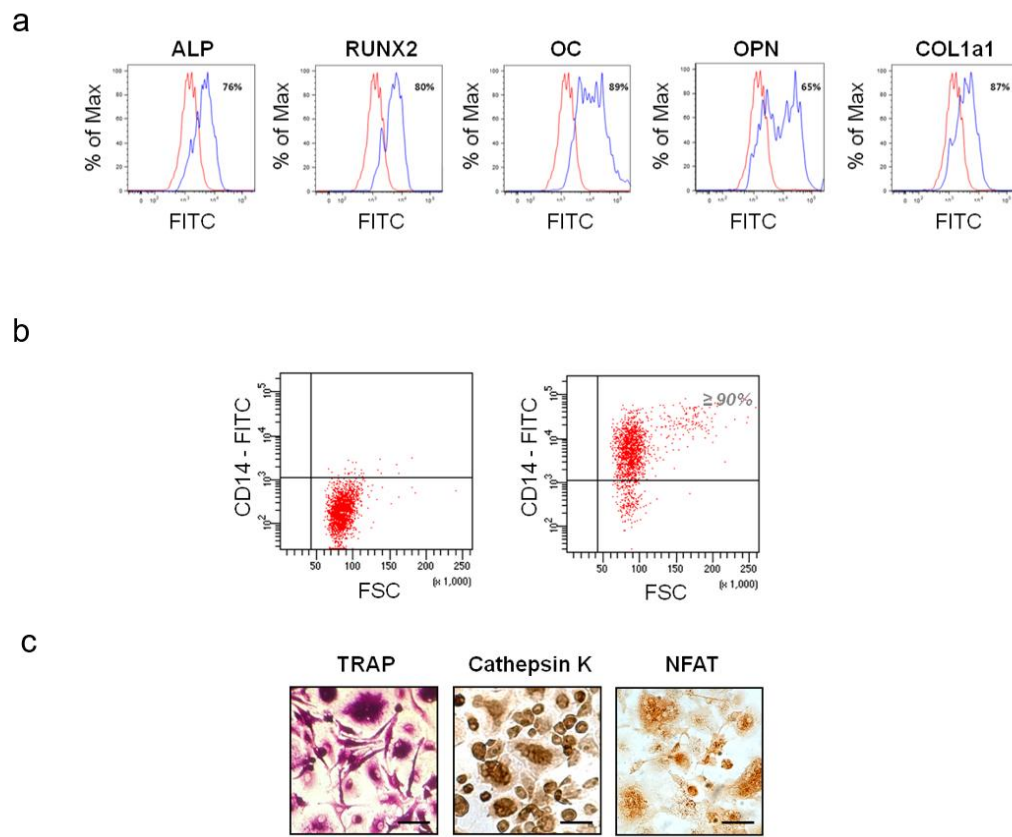

**Supplementary Figure S1.** Evaluation of isolated hOBs and hOCs quality after thawing. **(a)** Representative histogram of ALP, Runx2, OC, OPN and COL1a1 cytometric expression. **(b)** Representative dot plots of CD14<sup>+</sup> hOCs. **(c)** Representative images of TRAP, Cathepsin K and NFAT immunohistochemistry analysis. FSC (Forward Scatter); FITC (Fluorescein isothiocyanate); ALP (Alkaline Phosphatase); RUNX2 (Runt-related transcription factor 2); OC (Osteocalcin); OPN (Osteopontin); COL1a1 (Collagen type 1 alpha); TRAP (Acid Phosphatase Leukocyte); NFAT (Nuclear factor of activated T-cells).
